# Supplementary material for: A de novo paradigm for male infertility
Source: Research Square preprint supplement (doi:10.21203/rs.3.rs-332732/v1), 2021-03-22
Supplement: Supplementary file 3 [file 6ee6150960de8d37ee8e81af.xlsx]

## Sheet: Table 1 Clinical data
ID	Country of origin	Age of Patient*	Infertility in family	Comment on infertility in family	Genetic abnormalities in family	Comment on genetic abnormalities in family	Urological history	Medical history	Testicular volume left (cc)	Testicular volume right (cc)	Inhibin B (ng/L)	FSH (U/L)	Normal scrotal ultrasound	Semen pH	Semen volume (mL)	Semen concentration (x106/mL)	% progressively motile	VCM	% abnormal morfology	Conclusion semen analysis	Probable cause azoospermia
Proband_001	Netherlands	35	Yes	Mother exposed to Diethylstilbestrol (DES) use and had 3 miscarriage and 1 stillborn	No		Cryptorchidism with orchidectomy right	None	8	Absent	19	23	Yes	7.7	0.5	0	ND	ND	ND	Azoospermia	NOA
Proband_002	Netherlands	36	No		No		Cryptorchidism bilateral with orchidopexy	None	12	12	22	11	No: inguinal hernia bilateral	7.8	3.6	0	ND	ND	ND	Azoospermia	NOA
Proband_003	Netherlands	39	No		No		Orchidectomy right, orchitis right, coiling varicocele	Meningitis at age 3, bilateral inguinal hernia	15	10	21.3	15	Yes	7.5	4	<0.1	ND	ND	ND	Extreme oligozoospermia
Proband_004	Netherlands	35	No		No		None	None	5	5	NA	16.5	No: varicocele left	7.7	4.2	0	ND	ND	ND	Azoospermia	NOA
Proband_005	Netherlands	35	Yes	Brother from grandfather had male factor infertility	No		Varicocele right; retrograde ejaculation	None	8	8	28.4	25	No: epididymis cyst	7.7	0.6	0	ND	ND	ND	Azoospermia	NOA
Proband_006	Netherlands	30	Yes	Parents had difficulties conceiving; age gap of 5 years between patient and his brother, no fertility treatment necessary	Yes	Two sisters of mother are known with intellectual disability	Cryptorchidism with orchidopexy bilateral; hernia inguinalis bilateral; hydrocele	None	20	15	33.4	11	No: varicocele left	7.8	1.7	0	ND	ND	ND	Azoospermia	NOA
Proband_007	Netherlands	41	No	Mother had 2 miscarriages	No		None	None	8	8	13	25	Yes	7.5	1.3	0	ND	ND	ND	Azoospermia	NOA
Proband_008	Netherlands	26	No		No		None	None	15	15	24.6	6.3	No: microcalcifications bilateral	7.1	3.4	0	ND	ND	ND	Azoospermia	NOA
Proband_009	Netherlands	35	No		No		Torsio testis unilateral; orchidopexy unilateral	None	10	12	11	25	Yes	7.5	3.9	0	ND	ND	ND	Azoospermia	NOA
Proband_010	Netherlands	37	Yes	Parents had a hard time conceiving, mother had 1 miscarriage	No		None	None	14	12	15.1	16	Yes	7.5	8	0	ND	ND	ND	Azoospermia	NOA
Proband_011	Netherlands	41	No		No		Cryptorchism unilateral with orchidopexy twice	Normocytair anemia, parotitis	14	14	10.7	31	No: inhomogenous lesion left	7.7	3.5	0	ND	ND	ND	Azoospermia	NOA
Proband_012	Netherlands	31	No		Possible	1 stillborn sibling, cause unknown	Absence of vas deferens	None	20	20	ND	3	Yes	7	1	<0.1	ND	ND	ND	Extreme oligozoospermia
Proband_013	Netherlands	28	Yes	Brother has male factor infertility, also known with cryptorchidism and orchidopexy	No		Cryptorchidism with orchidopexy right	None	12	12	20.3	11	Yes	7.3	4.5	0	ND	ND	ND	Azoospermia	NOA
Proband_014	Netherlands	30	No	Mother had 1 or 2 miscarriages	No		None	None	20	22	13	16	No: microcalcifications left	7.5	1.9	0	ND	ND	ND	Azoospermia	NOA
Proband_015	Netherlands	29	No		No		Cryptorchidism bilateral with orchidopexy	None	16	15	26.6	15	No: inguinal hernia left	7.5	7.7	0	ND	ND	ND	Azoospermia	NOA
Proband_016	Netherlands	36	Unknown		Unknown		None	None	15	15	20.6	25	Yes	7.5	4.3	0	ND	ND	ND	Azoospermia	NOA
Proband_017	Netherlands	35	No		No		None	None	18	18	35	26	Yes	7.5	4.1	0	ND	ND	ND	Azoospermia	NOA
Proband_018	Netherlands	32	No		No		None	None	20	20	96.7	12	No: varicocele left; microcalcifications right	7.5	3.4	<0.1	ND	ND	ND	Extreme oligozoospermia
Proband_019	Netherlands	31	Yes	Male cousin has infertility, exact cause unknown	No		Cryptorchidism bilateral with orchidopexy	Congenital muscle dystrophy	14	14	13.9	22	No: atrophy/shrunk testis bilateral	7.7	1.3	0	ND	ND	ND	Azoospermia	NOA
Proband_020	Netherlands	31	No		No		None	None	9	9	18	28	No: cyst right testis	Unknown	Unknown	0	ND	ND	ND	Azoospermia	NOA
Proband_021	Netherlands	38	Yes	Brother of mother conceived a twin with IVF	No		None	None	15	12	26.6	25.1	No: varicocele left; microcalcifications right	7.7	4.3	0	ND	ND	ND	Azoospermia	NOA
Proband_022	Netherlands	38	Unknown		Unknown		None	None	18	18	19	14	NA	7.5	4.7	0	ND	ND	ND	Azoospermia	NOA
Proband_023	Netherlands	29	No		No		Testis carcinoma; orchidectomy right	None	20	Absent	31	3.4	Yes (1 side left)	7.3	3.1	0	ND	ND	ND	Azoospermia	NOA
Proband_024	Netherlands	30	No		No		Cryptorchidism with orchidopexy left; varicocele unilateral	None	8	10	43	31	No: varicocele left	7.5	5.5	0	ND	ND	ND	Azoospermia	NOA
Proband_025	Netherlands	31	No		No		Cryptorchidism bilateral with orchidopexy	None	13	15	9	33	No: cyst testis left, cyst epididymis right	7.3	2.8	0	ND	ND	ND	Azoospermia	NOA
Proband_026	Netherlands	32	No		No		Cryptorchidism bilateral with orchidopexy	None	6	5	24	8.7	No: varicocele left	7.5	1.5	0	ND	ND	ND	Azoospermia	NOA
Proband_027	Netherlands	34	No		Yes	One cousin with intellectual disability	Cryptorchidism with orchidopexy unilateral; hydrocele unilateral; atrophic testis	None	25	Not palpable	133	3.1	No: rough calcifications left	7.7	2	0	ND	ND	ND	Azoospermia	NOA
Proband_028	Netherlands	39	Yes	Brother with fertility problems, also on fathers side of the family	No		None	None	15	13	NA	11	No: inhomogenous lesions bilateral	Unknown	Unknown	Unknown	ND	ND	ND	Extreme oligozoospermia
Proband_029	Netherlands	32	Yes	Parents had difficulties conceiving, several miscarriages. A brother of mother has children but is known with male factor infertility	No		None	None	10	12	45.8	9.2	No: microcalcifications left	7.2	4.4	0	ND	ND	ND	Azoospermia	NOA
Proband_030	Netherlands	44	No		Unknown		None	None	25	15	50	13	No: varicocele bilateral	7.6	4.5	0	ND	ND	ND	Extreme oligozoospermia
Proband_031	Netherlands	29	No		No		Inguinal hernia bilteral	None	15	18	25	Unknown	No: indefinable tumour left, epididymis cyst right	7.7	2.9	0	ND	ND	ND	Azoospermia	NOA
Proband_032	Netherlands	27	No		No		None	None	10	10	22.5	16	No: varicocele left, microcalcifactions right	7.5	6.1	0	ND	ND	ND	Azoospermia	NOA
Proband_033	Netherlands	31	No		No		None	None	18	18	135	23.8	No: microcalcifications left	7.6	3.8	0	ND	ND	ND	Azoospermia	NOA
Proband_034	Unknown	31	No		No		None	None	15	20	26	11.9	No: Indefinable tumor left	7.5	1	0	ND	ND	ND	Azoospermia	NOA
Proband_035	Netherlands	27	No		No		Inguinal hernia; cryptorchidism with orchidopexy bilateral	None	15	15	43	11	NA	7.5	2.1	0	ND	ND	ND	Azoospermia	NOA
Proband_036	Netherlands	36	No	Parents had 4 miscarriages	No		None	None	14	10	15.7	28.2	No: varicocele left, cyst right	7.7	7.2	0	ND	ND	ND	Azoospermia	NOA
Proband_037	Netherlands	32	No		No		Cryptorchidism unilateral; orchidectomy due to non-seminoma	None	Absent	15	ND	19	Yes (1 side left)	7.6	3.3	0	ND	ND	ND	Azoospermia	NOA
Proband_038	Netherlands	29	No		No		Cryptorchidism bilateral with orchidpexy	None	18	18	12	27.1	Yes	8	1.7	0	ND	ND	ND	Azoospermia	NOA
Proband_039	Netherlands	30	Yes	Several uncles and cousins from mothers side of the familie with male factor infertility	No		None	None	12	10	13.4	14.9	No: epididymis cyst left	7.6	1.6	0	ND	ND	ND	Azoospermia	NOA
Proband_040	Netherlands	36	No		No		Cryptorchism unilateral with orchidopexy	None	6	6	26	37	No: varicocele left	7.7	2.9	0	ND	ND	ND	Azoospermia	NOA
Proband_041	Netherlands	35	No		No		Inguinal hernia unilateral	None	20	15	109	5.2	No: indefinable tumour bilateral	7.7	1.9	0	ND	ND	ND	Azoospermia	NOA
Proband_042	Netherlands	33	No		Yes	Cousin and niece with cystic fibrosis	None	None	10	10	10.3	28	No: varicocele left	7.5	9	0	ND	ND	ND	Azoospermia	NOA
Proband_043	Netherlands	37	No		No		None	None	12	15	NA	17	Yes	7.5	6	0	ND	ND	ND	Azoospermia	NOA
Proband_044	Netherlands	37	No		No		None	None	10	10	NA	7.4	NA	Unknown	Unknown	Unknown	ND	ND	ND	Azoospermia	NOA
Proband_045	Netherlands	32	No		No		None	None	15	15	16	23	NA	Unknown	Unknown	0	ND	ND	ND	Azoospermia	NOA
Proband_046	Netherlands	31	No		No		Cryptorchidism bilateral with orhidopexy ; inguinal hernia unilateral	None	Not palpable	20	74.9	13	No: varicocele right	7.5	3	0	ND	ND	ND	Azoospermia	NOA
Proband_047	Netherlands	40	No		No		None	None	13	13	21.7	21	No: varicocele left	7.5	1	0	ND	ND	ND	Azoospermia	NOA
Proband_048	Netherlands	32	Yes	Brother underwent ICSI treatment 5 times, unsuccessful	No		None	None	20	20	ND	26	Yes	8.3	4.8	<0.1	ND	ND	ND	Extreme oligozoospermia
Proband_049	Netherlands	20	No		No		Cryptorchidism bilateral with orchidopexy; hydrocele unilateral	None	15	1	18.8	16	Yes	7.7	1.7	0	ND	ND	ND	Azoospermia	NOA
Proband_050	Netherlands	26	No		No		None	None	15	15	82	10	No: varicocele left, cyst right	7.7	3.8	0.1	ND	ND	ND	Extreme oligozoospermia
Proband_051	Netherlands	27	Yes	Yes uncle and aunt could not conceive, they adopted children, unknown cause	No		Torsio testis unilateral	None	Absent	12	46.3	11	No: atrophy/shrunk testis left	8	2.1	<0.1	ND	ND	ND	Extreme oligozoospermia
Proband_052	Netherlands	28	Yes	Parents had difficulties conceiving, no fertility treatment	No		Cryptorchidism bilateral with orchidopexy	None	15	15	76.9	8.2	Yes	7.7	1.9	1.7	30	0.969	99	Severe oligoasthenoteratozoospermia
Proband_053	Netherlands	30	No		No		None	None	12	12	53.85	10	NA	7.7	3.3	<0.1	ND	ND	ND	Extreme oligozoospermia
Proband_054	Netherlands	30	Yes	Father and brother also known with cryptorchidism	No		Cryptorchidism bilateral with orchidopexy	None	10	10	46.87	15	No: hydrocele right	7.5	5	<0.1	ND	ND	ND	Extreme oligozoospermia
Proband_055	Netherlands	30	No	Brother and partner had difficulties conceiving and several miscarriages, female factor infertility	No		None	None	15	15	199	3	No: microcalcifications bilateral	7.5	2.8	0	ND	ND	ND	Azoospermia	Unclear OA or NOA
Proband_056	Netherlands	27	No		No		None	None	8	10	45	19	Yes	7.5	5.2	0	ND	ND	ND	Azoospermia	NOA
Proband_057	Netherlands	25	No		No		None	None	15	12	78	21	No: varicocele left	7.7	3	<0.1	ND	ND	ND	Extreme oligozoospermia
Proband_058	Netherlands	32	Unknown		Unknown		None	None	Unknown	Unknown	NA	8.3	NA	7.2	4.1	<0.1	ND	ND	ND	Extreme oligozoospermia
Proband_059	Netherlands	31	No		No		None	None	10	10	21.2	24	No: varicocele left	7.7	1.7	0	ND	ND	ND	Azoospermia	NOA
Proband_060	Netherlands	29	No		No		Varicocelectomy left	None	22	22	ND	4.9	No: microcalcifications left, hydrocele right	7.5	3.4	0	ND	ND	ND	Azoospermia	NOA
Proband_061	Netherlands	31	No		No		Cryptorchidism unilateral; orchidopexy unilateral	None	12	15	22.7	29	Yes	7.3	8.2	0	ND	ND	ND	Azoospermia	NOA
Proband_062	Netherlands	31	Yes	Parents had difficulties conceiving, only one child	No		None	None	10	10	91.1	6.6	Yes	7.5	2.3	0.2	ND	ND	ND	Extreme oligozoospermia
Proband_063	Netherlands	31	No		No		None	None	10	10	20	19.3	No: varicocele left	7.5	4.5	<0.1	ND	ND	ND	Extreme oligozoospermia
Proband_064	Netherlands	30	Unknown		Unknown		None	None	Unknown	Unknown	ND	ND	NA	8	3.7	0.9	18	0.5994	99	Severe oligozoospermia
Proband_065	Netherlands	32	No		Yes	Cousin (fathers side) deceased a couple months after birth. Cousin (mothers side) is known with intellectual disability	None	None	12	12	42.3	7.2	No: varicocele left, hydrocele right	7.5	2.8	0	ND	ND	ND	Azoospermia	NOA
Proband_066	Sint Maarten (Caribbean)	30	Yes	Cousin (mothers side) known with male factor infertility, brother of grandfather (mothers side) childless, cause unknown	No		None	None	15	12	34	9.1	No: hydrocele right	7.5	3.2	<0.1	ND	ND	ND	Extreme oligozoospermia
Proband_067	Netherlands	34	Unknown		Unknown		Unknown	Did not receive a full consultation in Radboudumc	Unknown	Unknown	NA	0	NA	7.4	3.3	0.4	47	0.62	99	Severe oligoteratozoospermia
Proband_068	Netherlands	33	No		Yes	Cousin has a chromosomal abnormality	None	None	20	20	171	1.7	Yes	7.7	7.8	0.3	24	0.56	99	Severe oligoasthenoteratozoospermia
Proband_069	Netherlands	34	No		No		Cryptorchism unilateral with orchidopexy; inguinal hernia unilateral	None	8	8	13.2	21	No: varicocele left	7.3	1.7	<0.1	ND	ND	ND	Extreme oligozoospermia
Proband_070	Netherlands	29	No		No		Orchitis, epididymitis both sides	None	15	18	5	44	Yes	7.5	4.8	0	ND	ND	ND	Azoospermia	NOA
Proband_071	Netherlands	34	Unknown		Unknown		None	None	Unknown	Unknown	NA	Unknown	NA	7.2	7.1	<0.1	ND	ND	ND	Extreme oligozoospermia
Proband_072	Netherlands	34	Unknown		Unknown		Unknown	None	Unknown	Unknown	NA	Unknown	NA	7.6	2	1.3	38	0.988	97	Severe oligoteratozoospermia
Proband_073	Netherlands	34	No		No		None	None	20	15	NA	15	No: epididymis cyst bilateral	7.5	1.1	<0.1	ND	ND	ND	Extreme oligozoospermia
Proband_074	Netherlands	30	No		No		Cryptorchidism with orchidopexy bilateral; glandulair hypospadie correction	None	Unknown	Unknown	ND	ND	NA	7.5	2.8	0.2	19	0.1064	ND	Severe oligoasthenozoospermia
Proband_075	Netherlands	31	Yes	Cousin is known with male factor infertility	Yes	Cousin is known with intellectual disability. Brother is known with autism due to asphyxia	None	None	10	10	5	32	Yes	7.5	1.5	0	ND	ND	ND	Azoospermia	NOA
Proband_076	Netherlands	35	No		No		None	None	15	15	86.6	7.4	Yes	<6.4	0.3	0	ND	ND	ND	Azoospermia	Unclear OA or NOA
Proband_077	Netherlands	35	No		No		Cryptorchism right, conservative treatment	None	Unknown	Unknown	24.3	32	No: varicocele left, inguinal hernia right	7.6	1.3	<0.1	ND	ND	ND	Extreme oligozoospermia
Proband_078	Netherlands	35	No		Yes	Sister with Turners syndrome (45X)	Hypogonadotrope hypogonadism	Mitochondrial encephalomyopathy, lactic acidosis and stroke-like episodes (MELAS); progressive hearingloss			NA	8.6	NA	8.8	4.7	0.4	20	0.376	99	Severe oligoasthenozoospermia
Proband_079	Netherlands	32	No		No		Cryptorchism bilateral with orchidpexy	None	14	14	17.6	0.73	NA	7.7	1.8	0	ND	ND	ND	Azoospermia	NOA
Proband_080	Netherlands	33	Yes	Two brothers also have cryptorchidism, one of them is known with male factor infertility and is starting fertility treatment	No		Inguinal hernia unilateral; cryptorchidism bilateral with orchidopexy	None	12	12	33.3	20	Yes	7.4	7.2	<0.1	ND	ND	ND	Extreme oligozoospermia
Proband_081	Netherlands	35	No		No		Cryptchism unilateral with orchidopexy; inguinal hernia unilateral	None	Unknown	Unknown	NA	Unknown	NA	8	4.5	0	ND	ND	ND	Azoospermia	NOA
Proband_082	Netherlands	30	No		No		Varicocele bilateral	None	12	10	45	10	NA	7.2	6.5	<0.1	ND	ND	ND	Extreme oligozoospermia
Proband_083	Netherlands	34	Yes	Parents known with female and male factor infertility and received fertility treatment	No		Inguinal hernia unilateral; cryptorchidism with orchidopexy unilateral; hydrocele unilateral	None	25	20	189	5.8	Yes	7.4	3	0	ND	ND	ND	Azoospermia	NOA
Proband_084	Netherlands	36	No		No		Spermatocele unilateral	None	15	15	189	4.2	No: cyst left	7.2	0.7	0	ND	ND	ND	Extreme oligozoospermia
Proband_085	Netherlands	29	No		Yes	Cousin with intellectual disability	None	None	Unknown	Unknown	ND	ND	NA	7.7	5.4	0.5	17	0.459	99	Severe oligoasthenoteratozoospermia
Proband_086	Netherlands	37	No		No		Cryptorchism unilateral with orchidopexy; inguinal hernia unilateral	None	25	25	251	2.9	No: cyst left, epididiymis cyst right	7.5	2.5	0	ND	ND	ND	Azoospermia	Unclear OA or NOA
Proband_087	Netherlands	27	No		Yes	Cousin with a congenital muscle disease	None	None	Unknown	Unknown	ND	16.7	NA	8.5	4.8	0.7	20	0.672	ND	Severe oligoasthenozoospermia
Proband_088	Netherlands	30	No		No		Cryptochidism bilateral with orchidopexy	None	10	12	18	40	Yes	7.4	5.8	<0.1	ND	ND	ND	Extreme oligozoospermia
Proband_089	Netherlands	36	Yes	Parents had two miscarriages and never managed to have a third child	No	Younger brother died due to a braintumor	None	None	15	18	NA	14	Yes	7.5	1.9	0	ND	ND	ND	Azoospermia	NOA
Proband_090	Unknown	33	No		No		None	None	15	10	ND	11	No: cyst epidydimis right	7.7	2	<0.1	ND	ND	ND	Extreme oligozoospermia
Proband_091	Netherlands	31	Yes	Brother and partner are known with infertility	Unknown		Cryptorchidism conservative treatment	Nose cancer with radiotherapy	10	10	33	9	Yes	7.5	5.2	<0.1	ND	ND	ND	Extreme oligozoospermia
Proband_092	Netherlands	35	No		No		None	None	16	14	33.3	28.5	Yes	7.5	2.6	0	ND	ND	ND	Azoospermia	NOA
Proband_093	Netherlands	31	Yes	Brother has male factor infertility	No		None	None	Unknown	Unknown	77	4.5	Yes	7.7	3	0.1	15	0.045	ND	Severe oligoasthenozoospermia
Proband_094	Netherlands	34	Yes	Father has male factor infertility (teratozoospermia)	No		Cryptorchidism unilateral with orchidopexy	None	12	10	ND	14.7	No: hydrocele left	7.7	3.2	<0.1	ND	ND	ND	Extreme oligozoospermia
Proband_095	Netherlands	31	No		Yes	Cousin deceased shortly after birth due to a genetic blistering skin disease	None	None	Unknown	Unknown	266	2.8	No: varicocele left	7.5	3.3	0	ND	ND	ND	Azoospermia	Unclear OA or NOA
Proband_096	Netherlands	35	No		No		None	None	10	10	5	25	Yes	7.7	2.2	<0.1	ND	ND	ND	Extreme oligozoospermia
Proband_097	Netherlands	37	No		No		None	None	20	20	161	3.8	NA	7.2	3.8	0	ND	ND	ND	Azoospermia	Unclear OA or NOA
Proband_098	Netherlands	32	No		No		Cryptorchidism bilateral with orchidopexy	None	20	20	85	8.3	Yes	7.2	5.1	1	36	1.84	99	Severe oligoteratozoospermia
Proband_099	Netherlands	29	Unknown		Unknown		None	None	Unknown	Unknown	ND	ND	NA	7.7	3.9	0.7	6	0.16	ND	Severe oligoasthenozoospermia
Proband_100	Netherlands	30	Yes	Uncle and two cousins are known with infertility, cause unknown	No		Cryptorchidism with orchidopexy unilateral	None	Unknown	Unknown	ND	ND	NA	7.6	4.7	2.5	6	0.71	99	Severe oligoasthenoteratozoospermia
Proband_101	Netherlands	38	Unknown		Unknown		Unknown	Did not receive a full consultation in Radboudumc	Unknown	Unknown	NA	Unknown	NA	7.2	2.7	<0.1	ND	ND	ND	Extreme oligozoospermia
Proband_102	Netherlands	31	No		No		None	None	20	20	39	18	NA	7.7	3.5	<0.1	ND	ND	ND	Extreme oligozoospermia
Proband_103	Unknown	39	No		No		None	None	Unknown	Unknown	NA	0	NA	7.7	4.4	2.6	51	ND	99	Severe oligoteratozoospermia
Proband_104	Netherlands	39	No		No		None	None	Unknown	Unknown	NA	12	NA	7.5	2.8	1.2	25	0.84	99	Severe oligoasthenoteratozoospermia
Proband_105	Netherlands	36	No		No		None	None	18	15	111	5	NA	7.4	5.5	0.1	12	0.07	ND	Severe oligoasthenozoospermia
Proband_106	Netherlands	33	Yes	Parents had difficulties with conceiving, 7 year age gap between patient and his brother. Mother had 2 miscarriages	No		Inguinal hernia bilateral	None	20	15	24.3	12	No: testicular and epididymis cyst left	7.5	3.8	0	ND	ND	ND	Azoospermia	NOA
Proband_107	Netherlands	40	No		No		None	None	Unknown	Unknown	NA	0	NA	7.5	2.7	0.8	23	0.5	98	Severe oligoasthenoteratozoospermia
Proband_108	Netherlands	40	Unknown		Unknown		Unknown	Did not receive a full consultation in Radboudumc	Unknown	Unknown	NA	0	NA	7.5	3.2	0.5	14	0.22	98	Severe oligoasthenoteratozoospermia
Proband_109	Netherlands	31	Unknown		Unknown		None	None	20	20	164	7	Yes	7.5	3.9	0.1	9	0.04	98	Severe oligoasthenoteratozoospermia
Proband_110	Netherlands	32	No		No		None	None	8	8	24	35.2	Yes	7.2	9.1	<0.1	ND	ND	ND	Extreme oligozoospermia
Proband_111	Netherlands	32	No		No		None	None	15	15	5	17.9	NA	7.5	3.5	<0.1	ND	ND	ND	Extreme oligozoospermia
Proband_112	Netherlands	35	Yes	Uncle with infertility and is childless	No		None	None	Unknown	Unknown	ND	ND	Yes	7.2	5.2	0.4	51	1.1	99	Severe oligoteratozoospermia
Proband_113	Netherlands	41	No		No		Cryptorchism unilateral with orchidopexy; inguinal hernia bilateral	None	15	15	78	16	No: microcalcifications left	7.2	5.6	<0.1	ND	ND	ND	Extreme oligozoospermia
Proband_114	Netherlands	33	No		No		None	None	Unknown	Unknown	ND	ND	NA	7.7	3.9	4	2	0.31	98	Severe oligoasthenoteratozoospermia
Proband_115	Netherlands	35	Yes	Uncle with male factor infertility (asthenozoospermia)	No		None	Bof, unknown if orchitis	25	25	136	2.4	NA	6.7	0.9	3.1	0	0	ND	Severe oligoasthenozoospermia
Proband_116	Netherlands	32	Unknown		Unknown		None	None	Unknown	Unknown	ND	ND	NA	7.7	0.8	5	9	0.36	98	Severe oligoasthenoteratozoospermia
Proband_117	Netherlands	42	Unknown		Unknown		Unknown	Did not receive a full consultation in Radboudumc	Unknown	Unknown	NA	Unknown	NA	7.2	8.2	0	ND	ND	ND	Azoospermia	Unclear OA or NOA
Proband_118	Netherlands	37	No		No		None	None	15	15	15	15	No: post-epididymitis right	7.5	5.5	0	ND	ND	ND	Azoospermia	NOA
Proband_119	Netherlands	36	No		No		Varicocele unilateral	None	Unknown	Unknown	ND	ND	NA	7.5	3.4	2.5	17	1.4	99	Severe oligoasthenoteratozoospermia
Proband_120	Netherlands	44	No		No		Unknown	None	Unknown	Unknown	NA	Unknown	NA	7.7	2.3	1.7	9	ND	ND	Severe oligoasthenozoospermia
Proband_121	Netherlands	44	No		No		Cryptorchism unilateral with orchidopexy	None	20	20	NA	5.4	No: varicocele left	7.6	3.5	0	ND	ND	ND	Azoospermia	Unclear OA or NOA
Proband_122	Netherlands	41	No		Unknown		None	None	20	20	196	5	No; varicocele left	7.5	5	0	ND	ND	ND	Azoospermia	NOA
Proband_123	Netherlands	45	No		No		None	None	10	15	NA	7	NA	7.8	4.2	0	ND	ND	ND	Azoospermia	NOA
Proband_124	Netherlands	44	No		No		None	Previously 4x ICSI in Germany; no pregnancy	Unknown	Unknown	ND	ND	NA	7.5	3.5	2	12	0.84	99	Severe oligoasthenoteratozoospermia
Proband_125	Netherlands	38	No		No		Cryptorchidism unilateral, conservative treatment	None	15	15	80	13	Yes	7.5	2.5	0	ND	ND	ND	Azoospermia	NOA
Proband_126	Netherlands	39	Unknown		Unknown		None	None	18	15	ND	15	NA	7.6	1.9	0.4	5	0.04	99	Severe oligoasthenoteratozoospermia
Proband_127	Netherlands	49	No		No		None	None	20	20	150	8	NA	7.4	1.8	<0.1	ND	ND	ND	Extreme oligozoospermia
Proband_128	Netherlands	28	No		Yes	Second cousin with Down's syndrome	Retractile testis as a child	None	6	6	43.5	16	Yes	8	1.7	0	ND	ND	ND	Azoospermia	NOA
Proband_129	Netherlands	31	Yes	Uncle from mothers side had fertility problems and no children	No		Cryptorchism unilateral with orchidopexy, unilateral absence of testicle, atrophic kidney unilateral, inguinal hernia bilateral	None	6	Absent	5	41.3	Yes	7.2	3.8	0	ND	ND	ND	Azoospermia	NOA
Proband_130	Netherlands	34	No		Possible	Cousin with cleft palate	Epididymitis	None	15	12	52.3	9.4	Yes	7.7	3.3	0	ND	ND	ND	Azoospermia	NOA
Proband_131	Netherlands	30	No		Yes	Cousin with intellectual disability	None	None	15	15	19.9	14	Yes	8	3.2	0	ND	ND	ND	Azoospermia	NOA
Proband_132	Netherlands	33	No		No		Testicular trauma	None	10	10	5	21	Yes	7.7	5.4	0	ND	ND	ND	Azoospermia	NOA
Proband_133	Netherlands	30	No		No		Testicular trauma bilateral	None	15	15	225	5	Yes	7.5	1.7	0	ND	ND	ND	Azoospermia	Unclear OA or NOA
Proband_134	Netherlands	27	No		No		None	None	12	10	18.9	17.5	No: varicocele left	8	1.2	0	ND	ND	ND	Extreme oligozoospermia
Proband_135	Netherlands	31	No		No		None	Attention-deficit hyperactivity disorder (ADHD)	6	6	<10	19	Yes	7.7	2.2	<0.1	50	ND	ND	Severe oligozoospermia
Proband_136	Netherlands	39	No		No		None	None	10	15	92.5	3.3	No: varicocele bilateral	7.7	5.3	0.4	28	0.6	ND	Severe oligoasthenozoospermia
Proband_137	Netherlands	32	No		No		None	None	12	12	82.5	5.8	Yes	7.8	0.5	0	ND	ND	ND	Azoospermia	NOA
Proband_138	Netherlands	35	No		No		Cryptorchism unilateral with orchidopexy; inguinal hernia bilateral; excision of cyste in left testicle	None	6	12	48.6	13	No: cyst left	7.5	4.2	0.1	ND	ND	ND	Extreme oligozoospermia
Proband_139	Netherlands	32	No		No		Cryptorchism bilateral with orchidopexy	None	5	5	46.6	12	No: varicocele bilateral, cyst left	7.9	3	0	ND	ND	ND	Extreme oligozoospermia
Proband_140	Netherlands	39	No		No		None	Gynaecomastia	12	12	14.9	16	No: hydrocele bilateral	7.5	3.3	0	ND	ND	ND	Azoospermia	NOA
Proband_141	Netherlands	34	No		No		None	None	10	10	37.4	26	No: inhomogenous lesion bilateral	7.2	2.3	0	ND	ND	ND	Azoospermia	NOA
Proband_142	Netherlands	28	No		No		None	None	10	10	39.7	15	Yes	7.2	3.5	0	ND	ND	ND	Azoospermia	NOA
Proband_143	Netherlands	31	Yes	Father had male factor infertility	No		None	Migraine	15	15	NA	22	No: cyst right	7.5	3.9	0	ND	ND	ND	Azoospermia	NOA
Proband_144	Unknown	31	No		No		None	None	8	8	ND	14.2	No: varicocele left	7.5	4.5	0	ND	ND	ND	Azoospermia	NOA
Proband_145	Netherlands	38	Yes	Sisters received hormonal treatment due to infertility, she now has 3 children	No		None	None	12	12	NA	4	Yes	7.7	3.2	0.01	ND	ND	ND	Extreme oligozoospermia
Proband_146	Unknown	33	No		No		None	None	10	10	ND	9.7	No: varicocele left, epididymis cyst bilateral	7.7	6.7	0.6	30	1.206	ND	Severe oligoasthenozoospermia
Proband_147	Netherlands	30	No		Yes	Congenital cardiomyopathie	None	None	15	12	NA	17	Yes	7.7	4.3	0.01	ND	ND	ND	Extreme oligozoospermia
Proband_148	Netherlands	31	No		No		None	None	8	8	NA	11	No: varicocele left	8	0.6	0	ND	ND	ND	Azoospermia	NOA
Proband_149	Netherlands	34	No		No		None	None	8	8	NA	26	Yes	7.5	3.5	0	ND	ND	ND	Azoospermia	NOA
Proband_150	Netherlands	38	No		No		None	Cystoscopy without abnormalities (symptoms of pain)	8	8	NA	26	Yes	7.7	4.1	0	ND	ND	ND	Azoospermia	NOA
Proband_151	Netherlands	37	Yes	No infertility but a brother and cousin with cryptorchidism	No		Cryptorchidism bilateral with orchidopexy	None	10	6	ND	20	No: varicocele left	8	2.8	0	ND	ND	ND	Azoospermia	NOA
Proband_152	United Arab Emirates	36	Yes	Youngest brother with male factor infertility (azoospermia)	No		None	None	10	10	ND	4.8	No: hydrocele left, cyst right	8	2.3	0	ND	ND	ND	Azoospermia	NOA
Proband_153	Netherlands	29	Yes	Brother is known with male factor infertility, conceived after insemination treatment	No		None	None	10	10	ND	27	Yes	7.2	2.2	0	ND	ND	ND	Azoospermia	NOA
Proband_154	Netherlands	30	No		No		None	None	16	16	NA	2	No: microcalcifications right	7.7	12.5	0	ND	ND	ND	Azoospermia	NOA
Proband_155	Netherlands	27	Yes	Uncle with fertility problems, unknown cause	No		None	None	12	10	NA	11	No: hydrocele bilateral	7.7	6.1	0	ND	ND	ND	Azoospermia	NOA
Proband_156	Netherlands	45	No		No		None	None	10	12	NA	19	No: microcalcifications right	7.5	2.7	0	ND	ND	ND	Azoospermia	NOA
Proband_157	Netherlands	35	No		No		Inguinal hernia unilateral	None	5	6	NA	28	No: varicocele left, cyst right	8	1.6	0	ND	ND	ND	Azoospermia	NOA
Proband_158	Netherlands	26	No		No		None	None	15	15	NA	5	Yes	7.7	2.5	0	ND	ND	ND	Azoospermia	NOA
Proband_159	Netherlands	27	No		No		Cryptorchism bilateral with orchidopexy	None	5	5	NA	33	No: cyst left, hypovascularisation right	7.7	4.3	0	ND	ND	ND	Azoospermia	NOA
Proband_160	Netherlands	32	Yes	Cousin with male factor infertility (oligozoospermia)	No		Inguinal hernia unilateral	None	15	10	NA	10	Yes	7.5	2.8	0	ND	ND	ND	Azoospermia	NOA
Proband_161	Netherlands	32	Yes	Two sisters, both with irregulair menstrual cycle	No		None	None	8	10	NA	16	No: varicocele left	7.5	6.1	0	ND	ND	ND	Azoospermia	NOA
Proband_162	Netherlands	34	Yes	Brother fertility problems and cryptorchism	No		Cryptorchism unilateral with orchidopexy	None	10	20	NA	8.3	No: hydrocele right	7.5	2.1	0.1	ND	ND	ND	Extreme oligozoospermia
Proband_163	Netherlands	37	No		No		None	None	8	6	NA	13	No: microcalcifications left, epididymis cyst right	7.5	3.2	0	ND	ND	ND	Azoospermia	NOA
Proband_164	Netherlands	37	No		No		None	Patent ductus arteriosus	6	6	NA	19	No: microcalcifications left	7.7	1.8	0	ND	ND	ND	Azoospermia	NOA
Proband_165	Netherlands	35	No		No		Cryptorchism unilateral with orchidopexy; orchidectomy unilateral due to torsio	None		10	NA	23	Yes	7.9	4.4	0	ND	ND	ND	Extreme oligozoospermia
Proband_166	Netherlands	30	No		No		Cryptorchism unilateral with orchidopexy; intra-abdominal gonade unilateral; hypoplastic prostate; mullerian duct remnants; disorders of sexual development (DSD)	None	3	Unknown	NA	33	No: atrophic testis left	7.5	2.2	0	ND	ND	ND	Azoospermia	NOA
Proband_167	Netherlands	33	No		No		None	None	15	15	NA	2.7	No: microcalcifications bilateral	7.5	2.7	0	ND	ND	ND	Azoospermia	NOA
Proband_168	Netherlands	37	No		No		Cryptorchism unilateral with orchidopexy	None	6	10	NA	10	Yes	7.5	3.6	0	ND	ND	ND	Extreme oligozoospermia
Proband_169	Netherlands	34	No		No		Correction of hypospadia	None	12	8	NA	18.3	No: cyst left	7.7	4	0	ND	ND	ND	Azoospermia	NOA
Proband_170	Netherlands	43	No		No		Cryptorchism unilateral; inguinal hernia unilateral	Colitis ulcerosa	10	10	NA	33	Yes	7.7	2.8	0	ND	ND	ND	Azoospermia	NOA
Proband_171	United Kingdom	27	No		No		None	Right ear surgery - deaf	15	15	NA	7.4	NA	8	2.9	0	ND	ND	ND	Azoospermia	NOA
Proband_172	United Kingdom	36	No		No		None	Cholecystectomy and gastric bypass (2011)	15	15	NA	11.3	NA	8	9.9	0	ND	ND	ND	Azoospermia	NOA
Proband_173	United Kingdom	30	No		No		None	Asthma	20	20	NA	18.4	NA	7.5	2.6	0	ND	ND	ND	Azoospermia	NOA
Proband_174	United Kingdom	32	Yes	Cousin has CF	No		Left varicocele embolisation	Right strangulated hernia as a baby;	20	20	NA	20.8	NA	8	4.7	0	ND	ND	ND	Azoospermia	NOA
Proband_175	United Kingdom	35	No		No		Cryptorchism bilateral with orchidopexy; Seminoma	Anxiety/depression;	8	8	NA	49.2	NA	8.5	3.2	0	ND	ND	ND	Azoospermia	NOA
Proband_176	United Kingdom	34	No		No		Varicocele	None	15	15	NA	19.3	NA	7.5	3.6	0	ND	ND	ND	Azoospermia	NOA
Proband_177	United Kingdom	23	No		No		None	None	8	6	NA	11.4	NA	Unknown	5.2	<2	49	5.1	99	Severe oligozoospermia
Proband_178	United Kingdom	33	No		No		Cryptorchism bilateral with orchidopexy	Undescended Testes	10	12	NA	19	NA	Unknown	4.3	<2	30	0.6	100	Severe oligozoospermia
Proband_179	United Kingdom	31	Yes	Brother x2 required ICSI treatment for very poor sperm quality. Paternal Uncle and Aunt are infertile as well.	No		Cryptorchism bilateral with orchidopexy	Gastic reflux	12	12	NA	28.4	NA	8	3.5	0	ND	ND	ND	Azoospermia	NOA
Proband_180	United Kingdom	40	No		No		Cryptorchism bilateral with orchidopexy	RTA fractured pelvis	10	10	NA	25.8	NA	8	6.7	0	ND	ND	ND	Azoospermia	NOA
Proband_181	United Kingdom	38	No		No		Cryptorchism unilateral with orchidopexy	None	30	30	NA	5.4	NA	Unknown	7.1	<2	20	2.8	99	Severe oligozoospermia
Proband_182	United Kingdom	30	No		No		Cryptorchism bilateral with orchidopexy	None	15	15	NA	36.2	NA	8	3.7	0	ND	ND	ND	Azoospermia	NOA
Proband_183	United Kingdom	38	No		No		Cryptorchism	Gout	15	15	NA	16	NA	10	4.7	0	ND	ND	ND	Azoospermia	NOA
Proband_184	United Kingdom	30	No		No		Small R+L varicoceles	Asthma; Lesion at cervicomedullary junction = asymptomatic; Peanut allergy	25	25	NA	20	NA	Unknown	2.8	0	ND	ND	ND	Azoospermia	NOA
Proband_185	United Kingdom	31	No		No		None	None	10	10	NA	21.2	NA	9	2.4	0	ND	ND	ND	Azoospermia	NOA
NA =not available
ND = not determined
NOA = non-obstructive azoospermia
* At diagnosis of infertility

## Sheet: Table 2 Treatment outcome
ID	TESE performed	TESE side	Sperm found	Sperm motility	TESE Malignancy	ICSI treatment	Pregnancy	Live birth
Proband_001	Yes	Left	No	No sperm	No	No	No	No
Proband_002	Yes	Both, no sperm	No	No sperm	No	No	No	No
Proband_003	Yes	Both	Yes	Motile	No	Yes	Yes	Yes
Proband_004	Yes	Both, no sperm	No	No sperm	No	No	No	No
Proband_005	Yes	Both, no sperm	No	No sperm	No	No	No	No
Proband_006	Yes	Both, no sperm	No	No sperm	No	No	No	No
Proband_007	Yes	Both, no sperm	No	No sperm	No	No	No	No
Proband_008	Yes	Both, no sperm	No	No sperm	No	No	No	No
Proband_009	Yes	Left	No	No sperm	No	No	No	No
Proband_010	Yes	Left	No	No sperm	No	No	No	No
Proband_011	Yes	Both, no sperm	No	No sperm	No	No	No	No
Proband_012	Yes	Right	Yes	Non-motile	No	Yes	Yes	Yes
Proband_013	Yes	Both, no sperm	No	No sperm	No	No	No	No
Proband_014	Yes	Right	No	No sperm	No	No	No	No
Proband_015	Yes	Both, no sperm	No	No sperm	No	No	No	No
Proband_016	Yes	Right	No	No sperm	No	No	No	No
Proband_017	Yes	Both, sperm both sides	Yes	Motile	No	Yes	No	No
Proband_018	Yes	Left	Yes	Non-motile	No	Yes	No	No
Proband_019	Yes	Left	No	No sperm	No	No	No	No
Proband_020	Yes	Right	Yes	Motile	Unknown	Yes	Yes	Yes
Proband_021	Yes	Left	No	No sperm	No	No	No	No
Proband_022	Yes	Right	No	No sperm	Unknown	No	No	No
Proband_023	Yes	Left	Yes	Motile	No	Yes	No	No
Proband_024	Yes	Right	Yes	Motile	Unknown	Yes	No	No
Proband_025	Yes	Both, sperm right	Yes	Motile	No	Yes	Yes	Yes
Proband_026	Yes	Right	Yes	Motile	No	Yes	Yes	Yes
Proband_027	Yes	Left	Yes	Motile	No	Yes	Yes	Yes
Proband_028	Yes	Both, sperm right	Yes	Non-motile	No	Yes	No	No
Proband_029	Yes	Right	No	No sperm	No	No	No	No
Proband_030	Yes	Left	Yes	Motile	No	Yes	Yes	Yes
Proband_031	Yes	Both, no sperm	No	No sperm	No	No	No	No
Proband_032	Yes	Both, sperm both sides	Yes	Motile	No	Yes	Yes	Yes
Proband_033	Yes	Right	No	No sperm	Unknown	No	No	No
Proband_034	Yes	Both, no sperm	No	No sperm	No	No	No	No
Proband_035	Yes	Both, sperm right	Yes	Motile	No	Yes	No	No
Proband_036	Yes	Left	No	No sperm	No	No	No	No
Proband_037	Yes	Right	Yes	Motile	No	Yes	Yes	Yes
Proband_038	Yes	Unknown	Unknown	Unknown	Unknown	Yes	Yes	Yes
Proband_039	Yes	Both, sperm right	Yes	Non-motile	No	No	No	No
Proband_040	Yes	Right	Yes	Motile	No	Yes	Yes	Yes
Proband_042	Yes	Both, no sperm	No	No sperm	No	No	No	No
Proband_043	Yes	Left	Yes	Non-motile	No	Yes	No	No
Proband_044	Yes	Left	No	No sperm	No	No	No	No
Proband_045	Yes	Right	No	No sperm	Unknown	No	No	No
Proband_046	Yes	Both, sperm right	Yes	Motile	No	Yes	Yes	Yes
Proband_047	Yes	Both, no sperm	No	No sperm	No	No	No	No
Proband_048	Yes	Both, no sperm	No	No sperm	No	No	No	No
Proband_053	Yes	Right	Yes	Motile	No	Yes	Yes	Yes
Proband_059	Yes	Both, no sperm	No	No sperm	No	No	No	No
Proband_060	Yes	Both, no sperm	No	No sperm	No	No	No	No
Proband_061	Yes	Both, sperm right	Yes	Motile	No	Yes	Yes	Yes
Proband_063	Yes	Both, sperm right	Yes	Motile	No	Yes	Yes	Yes
Proband_065	Yes	Both, sperm both sides	Yes	Motile	No	Yes	Yes	Yes
Proband_069	Yes	Right	Yes	Motile	No	Yes	No	No
Proband_070	Yes	Both	Yes	Motile	No	No	No	No
Proband_077	Yes	Left	Yes	Motile	No	Yes	Yes	Yes
Proband_079	Yes	Right	Yes	Motile	No	Yes	Yes	Yes
Proband_083	Yes	Both, sperm both sides	Yes	Motile	No	Yes	Yes	Yes
Proband_086	Yes	Both, sperm both sides	Yes	Motile	No	Yes	Yes	Yes
Proband_089	Yes	Both, no sperm	No	No sperm	No	No	No	No
Proband_090	Yes	Unknown	Yes	Motile	Unknown	Yes	Yes	Yes
Proband_092	Yes	Both, no sperm	No	No sperm	No	No	No	No
Proband_095	Yes	Right	Yes	Motile	Unknown	Yes	Yes	Yes
Proband_096	Yes	Both, sperm both sides	Yes	Non-motile	No	Yes	Yes	Yes
Proband_097	Yes	Left	Yes	Motile	No	Yes	Yes	Yes
Proband_106	Yes	Both, no sperm	No	No sperm	No	No	No	No
Proband_115	Yes	Both, sperm both sides	Yes	Motile	No	Yes	Yes	Yes
Proband_121	Yes	Right	Yes	Non-motile	No	Yes	No	No
Proband_122	Yes	Right	Yes	Unknown	No	Yes, zero oocytes	No	No
Proband_123	Yes	Unknown	Yes	Non-motile	No	Yes	No	No
Proband_125	Yes, elsewhere	Unknown, elsewhere	Unknown	Unknown, elsewhere	Unknown, elsewhere	Yes, elsewhere	Yes	Yes
Proband_128	Yes	Both, sperm both sides	Yes	Motile	No	Yes	Yes	No
Proband_129	Yes	Both, no sperm	No	No sperm	No	No	No	No
Proband_131	Yes	Both, sperm left	Yes	Non-motile	No	Yes	Yes	Yes
Proband_132	Yes	Both, sperm both sides	Yes	Non-motile	No	Yes	Yes	Yes
Proband_134	Yes	Both, sperm both sides	Yes	Motile	No	Yes	Yes	Yes
Proband_137	Yes	Both, sperm right	Yes	Motile	No	Yes	No	No
Proband_138	Yes	Right	Yes	Motile	No	Yes	Yes	Yes
Proband_140	Yes	Both, sperm both sides	Yes	Motile	No	Yes	No	No
Proband_141	Yes	Both, sperm both sides	Yes	Motile	No	Yes	Yes	Yes
Proband_142	Yes	Both, sperm both sides	Yes	Motile	No	Yes	Yes	No
Proband_143	Yes	Both, sperm both sides	Yes	Motile	No	Yes	No	No
Proband_144	Yes	Both, sperm both sides	Yes	Motile	Unknown	Yes	Yes	Yes
Proband_148	Yes	Both, no sperm	No	No sperm	No	No	No	No
Proband_149	Yes	Both, sperm both sides	Yes	Motile	No	Yes	Yes	Yes
Proband_150	Yes	Both, no sperm	No	No sperm	No	No	No	No
Proband_151	Yes	Both, no sperm	No	No sperm	No	No	No	No
Proband_152	Yes	Both, no sperm	No	No sperm	No	No	No	No
Proband_153	Yes	Both, sperm right	No	Motile	No	Yes	Yes	Yes
Proband_155	Yes	Both, sperm right	Yes	Motile	No	Yes	No	No
Proband_156	Yes	Both, no sperm	No	No sperm	No	No	No	No
Proband_157	Yes	Both, no sperm	No	No sperm	No	No	No	No
Proband_159	Yes	Both, sperm right	Yes	Motile	No	Yes	Yes	Yes
Proband_160	Yes	Both, no sperm	No	No sperm	No	No	No	No
Proband_161	Yes	Both, no sperm	No	No sperm	No	No	No	No
Proband_162	Yes	Right, no sperm	No	No sperm	No	No	No	No
Proband_163	Yes	Both, sperm both sides	Yes	Motile	No	Yes	Yes	Yes
Proband_164	Yes	Both, sperm both sides	Yes	Motile	No	Yes	Yes	Yes
Proband_165	Yes	Right	Yes	Non-motile	No	Yes	Yes	Yes
Proband_166	Yes	Both, no sperm	No	No sperm	No	No	No	No
Proband_167	Yes	Both, sperm both sides	Yes	Motile	No	Yes	Yes	Yes
Proband_168	Yes	Both, sperm both sides	Yes	Motile	No	Yes	No	No
Proband_169	Yes	Both, sperm both sides	Yes	Motile	No	Yes	No	No
Proband_170	Yes	Both, sperm both sides	Yes	Motile	No	No	No	No
Proband_171	Yes	Both, no sperm	No	No sperm	Unknown	No	No	No
Proband_172	Yes	Both, sperm both sides	No	Non-motile	Unknown	No	No	No
Proband_173	Yes	Both, sperm right	Yes	Motile	Unknown	Yes	Unknown	Unknown
Proband_174	Yes	Right, no sperm	No	No sperm	Unknown	No	No	No
Proband_175	Yes	Left	Yes	Motile	Unknown	Yes	Yes	No, miscarriage
Proband_176	Yes	Both, sperm both sides	Yes	Non-motile	Unknown	Yes	No	No
Proband_179	Yes	Both	Yes	Motile	Unknown	Yes	No	No
Proband_180	Yes	Both, sperm right	Yes	Non-motile	Unknown	No	No	No
Proband_182	Yes	Both	Yes	Non-motile	Unknown	No	No	No
Proband_183	Yes	Both, no sperm	No	No sperm	Unknown	No	No	No
Proband_184	Yes	Both, no sperm	No	No sperm	Unknown	No	No	No
Proband_185	Yes	Both, no sperm	No	No sperm	Unknown	No	No	No

## Sheet:  Table 3 Histology classificati
Classification	Definition
Tubular shadow (TS)	The complete absence of Sertoli and germ cells in the seminiferous epithelium.
Sertoli cell only (SCO)	Only Sertoli cells are present in tubules. Germ cells are completely absent.
SCO/minimal-Germ Cell Arrest(mCGCA)	Predominantly tubules in which only Sertoli cells are present. In addition, some tubules that do contain germ cells are observed. These germ cells are arrested prior to finalization of spermatogenesis.
Germ Cell Arrest (GCA)	Spermatogenesis is blocked at a certain stage prior to its finalization.
GCA in spermatogonia
GCA in meiosis
GCA in spermiogenesis
Hypospermatogenesis (HS)	Tubules that only contain Sertoli cells are present in addition to tubules that contain all stages of spermatogenesis.
HS-mild
HS-severe
HS-partial Germ Cell Arrest	Tubules that show normal, unperturbed spermatogenesis are present, in addition to tubules that show a germ cell arrest.
Complete Spermatogenesis (CS)	The majority of tubules contains all stages of spermatogenesis.

## Sheet: Table 4 Pathology notes
ID	Conclusion histology left	Conclusion histology right	Overall conclusion histology	Conclusion cytology left	Conclusion cytology right	Overall conclusion cytology	Spermatozoa in cell suspension biopsy	Diagnosis semen analysis	Description of spermatogenesis in proband	Overall conclusion	Detailed conclusion
Proband_001	HS-severe	NP	HS-severe	HS	NP	HS	No	Azoospermia	Both histological sections and cytological preparations indicated hypospermatogenesis. Predominantly (~95%) tubules containing Sertoli cells only were present, occasionally tubules did contain complete spermatogenesis.	HS	HS-severe
Proband_002	SCO	SCO	SCO	SCO/minimal GCA	SCO/minimal GCA	SCO/minimal GCA	No	Azoospermia	No tubules containing germ cells were observed in the histological sections. However a small number of spermatocytes were observed in the cytological preparations. No spermatozoa were observed in any of the three types of testicular preparations.	SCO/minimal GCA	SCO/minimal GCA
Proband_003	HS-severe	HS-mild	HS-mild	SCO	CS	SCO/CS	Yes	Extreme oligozoospermia	Both biopsies used for histology showed a reduced level of spermatogenesis and extensive hyalinization. In the left biopsy only ~10% of the tubules showed elongating spermatids whereas on the right side this was ~30%.	HS	HS-mild
Proband_004	SCO	SCO	SCO	SCO	SCO	SCO	no	Azoospermia	A complete lack of germ cells was observed in both biopsies while Sertoli cells were present. This was confirmed by cytology.	SCO	SCO
Proband_005	SCO	SCO	SCO	SCO	SCO	SCO	No	Azoospermia	No germ cells were observed in any of the three types of testicular preparations.	SCO	SCO
Proband_006	GCA in meiosis	GCA in meiosis	GCA in meiosis	SCO/minimal GCA	SCO/minimal GCA	SCO/minimal GCA	No	Azoospermia	Histology preparations showed a complete maturation arrest at the spermatocyte stage. The number of germ cells with respect to Sertoli cells was decreased according to cytology, though histological sections did not indicate tubules completely devoid of germ cells.	GCA	GCA-meiosis
Proband_007	SCO	SCO	SCO	SCO	NA	SCO	No	Azoospermia	No germ cells were observed in any of the three types of testicular preparations. Cytological preparation of one biopsy was unavailable.	SCO	SCO
Proband_008	SCO	SCO	SCO	SCO	SCO	SCO	No	Azoospermia	No germ cells were observed in any of the three types of testicular preparations.	SCO	SCO
Proband_009	SCO	NP	SCO	SCO	NP	SCO	no	Azoospermia	A complete lack of germ cells was observed in this biopsy while Sertoli cells were present. This was confirmed by cytology.	SCO	SCO
Proband_010	SCO	NP	SCO	NA	NP	-	No	Azoospermia	No germ cells were observed in histological preparations nor in the biopsy-derived cell suspension. Cytological preparations were unavailable.	SCO	SCO
Proband_011	SCO	SCO	SCO	SCO	SCO	SCO	no	Azoospermia	A complete lack of germ cells was observed in both biopies while Sertoli cells were present. This was confirmed by cytology.	SCO	SCO
Proband_012	NP	CS	CS	NP	pGCA	pGCA	Yes	Extreme oligozoospermia	Histological sections showed that 75% of the tubules contained ES. Frequently germ cell devoid patches in the epithelium were observed. The cytological analysis indicated a partial maturation arrest.	CS	CS
Proband_013	SCO	SCO	SCO	SCO	SCO	SCO	No	Azoospermia	No germ cells were observed in any of the three types of testicular preparations.	SCO	SCO
Proband_014	NP	SCO	SCO	NP	SCO	SCO	No	Azoospermia	No germ cells were observed in any of the three types of testicular preparations.	SCO	SCO
Proband_015	SCO	SCO	SCO	SCO	SCO	SCO	No	Azoospermia	No germ cells were observed in any of the three types of testicular preparations.	SCO	SCO
Proband_016	NP	SCO	SCO	NP	SCO	SCO	no	Azoospermia	A complete lack of germ cells was observed in this biopsy while Sertoli cells were present. This was confirmed by cytology.	SCO	SCO
Proband_017	HS-severe	NA	HS-severe	HS + pGCA	NA	HS + pGCA	Yes	Azoospermia	Only a crushed biopsy from the left testis was available for analysis. In these histological sections a mix of tubules devoid of germ cells (~90%) and tubules containing complete spermatogenesis was observed. Cytological analysis also indicated a starkly decreased number of germ cells (spermatocytes and spermatozoa) in respect to Sertoli cells, which fits with the observed HS in histological sect…	HS	HS-severe
Proband_018	HS-severe	NP	HS-severe + tubular hyalinization	SCO/minimal GCA	NP	SCO/minimal GCA	Yes	Extreme oligozoospermia	Limited power of histological analysis due to poor structural conservation of biopsy. Some germ cells were observed in histological sections and cytological preparations. Spermatozoa were present in the cell suspension.	HS	HS-severe
Proband_019	SCO	NP	SCO	SCO	NP	SCO	No	Azoospermia	Quality of histological sections was poor due to crushing of biopsy. No germ cells were observed in any of the three types of testicular preparations.	SCO	SCO
Proband_020	NP	NA	-	NP	SCO	SCO	Yes	Azoospermia	No biopsy was availbale for histological analysis. The cytological preparation showed presence of only Sertoli cells suggesting SCO. However, some spermatozoa were seen during inspection of the biopsy-derived cell suspension though, indicative of hypospermatogenesis.	HS	HS-severe
Proband_021	SCO	NP	SCO	SCO	NP	SCO	No	Azoospermia	No germ cells were observed in testicular preparations or in the biopsy-derived cell suspension.	SCO	SCO
Proband_022	NP	NA	-	NP	SCO	SCO	No	Azoospermia	No biopsy was availbale for histological evaluation. Germ cells were absent from the cytological preparation and the biopsy-derived cell suspension.	SCO	SCO
Proband_023	HS-severe	NP	HS-severe	NA	NP	-	Yes	Azoospermia	Apart from numerous (~90%) tubules devoid of any germ cells, some tubules containing complete or incomplete spermatogenesis were also observed. When arrest occurred this was in spermatocytes. Cytological preparations were unavailable.	HS	HS-severe
Proband_024	NA	NA	-	HS	NA	HS	Yes	Azoospermia	Histological sections were not available. Spermatozoa and meiotic cells were observed in the cytological preparation though both their numbers were low.	HS	HS-severe
Proband_025	HS-severe	SCO	HS-severe	SCO/minimal GCA	SCO	SCO/minimal GCA	Yes	Azoospermia	Only histological sections of crushed biopsies available. The left biopsy predominantly (~95%) showed germ cell-devoid tubules. However, pockets of tubules containing complete spermatogenesis were observed. In the sections from the right bipsy no germ cells were observed. In the cytological preparation of the left biopsy a small number of spermatocytes was observed, though no spermatozoa. Spermat…	HS	HS-severe
Proband_026	NP	HS-pGCA	HS-pGCA	NP	HS	HS	Yes	Azoospermia	Histological evaluation showed both tubules with complete spermatogenesis (45%) as well as tubules in which meiotic cells and spermatids were absent. The cytological evaluation indicated a loss of germ cells in relation to Sertoli cells.	HS	HS-pGCA
Proband_027	HS-pGCA	NP	HS-pGCA	pGCA	NP	pGCA	Yes	Azoospermia	Histological examination indicated that ~45% of the tubules contained complete spermatogenesis. However several tubules showed an absence of spermatids. Patches without germ cells were frequently present in the epithelium. Spermatocyte-spermatozoa ratio in the cytological prepartion was also indicative for a partial maturation arrest.	HS	HS-pGCA
Proband_028	GCA-spermatogonia	GCA-spermatogonia	GCA-spermatogonia	SCO/minimal GCA	SCO/minimal GCA	SCO/minimal GCA	yes	Extreme oligozoospermia	Extensive hyalinization was observed in both biopsies. In all tubules germ cells were present but in most of them only as spermatogonia. Infrequently some spermatocytes but no spermatids were observed. This was confirmed by cytology. In the TESE sample analysed for cryopreservation, however, spermatozoa were observed.	HS	HS-severe
Proband_029	NP	SCO	SCO	NP	SCO/minimal GCA	SCO/minimal GCA	No	Azoospermia	None of the tubules observed in the histological sections contained germ cells. However, a small number of spermatocytes was observed in the cytological preparations. No spermatozoa were detected in any of the three types of testicular preparations.	SCO/minimal GCA	SCO/minimal GCA
Proband_030	HS	NP	HS-mild	CS	NP	CS	yes	Extreme oligozoospermia	Only testis scrapes were available for analysis. Disorted tubules with and without content were observed. Cytology indicated complete spermatogenesis.	HS	HS-mild
Proband_031	SCO	SCO	SCO	SCO/minimal GCA	NA	SCO/minimal GCA	yes	Azoospermia	Only testis scrapes were available for analysis. No germ cells were observed in the distorted tubules while in the cytology sample some spermatocytes were observed. In the TESE sample analysed for cryopreservation, however, spermatozoa were observed.	HS	HS-severe
Proband_032	SCO/minimal GCA	CS	CS	HS	CS	CS	Yes	Azoospermia	Status of spermatogenesis varied greatly between the two testes. The right biopsy consisted mainly (~75%) of tubules that contained ES whereas in the biopsy of the left side, predominantly germ cell-devoid tubules, sometimes with spermatogonia and less frequently with spermatocytes were observed. The cytological preparation confirmed complete spermatogenesis in the right biopsy. In cytological sl…	CS	CS
Proband_033	NP	NA	-	NP	SCO	SCO	No	Azoospermia	Histology preparations were unavailable. No germ cells were observed in testicular preparation (based on cytology only) or in the biopsy-derived cell suspension.	SCO	SCO
Proband_034	SCO	NA	SCO	SCO	SCO	SCO	No	Azoospermia	No germ cells were observed in any of the three types of testicular preparations. Histological sections of the right biopsy were absent.	SCO	SCO
Proband_035	HS-pGCA	NA	HS-pGCA + tubular hyalinization	HS	NA	HS	Yes	Azoospermia	Only one testis biopsy was available for analysis. Histological sections showed extensive hyalinization of the tubules. A mix of tubules devoid of germ cells and tubules containing complete or incomplete spermatogenesis was observed. When the germ cell population was arrested this was during meiosis. Cytological analysis indicated a starkly decreased number of germ cells in respect to Sertoli cel…	HS	HS-pGCA
Proband_036	SCO	NP	SCO	SCO	NP	SCO	no	Azoospermia	A complete lack of germ cells was observed in this biopsy while Sertoli cells were present. This was confirmed by cytology.	SCO	SCO
Proband_037	NP	HS-pGCA	HS-pGCA	NP	pGCA	pGCA	Yes	Azoospermia	Frequently tubules that show meiotic arrest in addition to tubules with complete spermatogenesis were observed in the histological sections. The cytological data also indicated a p-MA.	HS	HS-pGCA
Proband_038	NA	NP	-	HS	NP	HS	Yes	Azoospermia	No biopsy was available for histological analysis. The cytological preparation predominantly showed Sertoli cells, though a small number of spermatocytes and one spermatozoa were observed.	HS	HS-severe
Proband_039	SCO	SCO	SCO	SCO	NA	SCO	Yes	Azoospermia	No germ cells were observed in either histological or cytological preparations. However, some spermatozoa were seen during inspection of the biopsy-derived cell suspension, though indicative of hypospermatogenesis.	HS	HS-severe
Proband_040	NP	NA	-	NP	HS + pGCA	HS	yes	Azoospermia	No histology sample was available. In the cytology sample spermatoza were observed to such an extend that suggested HS-mild. This was also the case in the biopsy analysed for cryopreservation.	HS	HS-mild
Proband_041	HS-severe	NP	HS-severe	HS + pGCA	NP	HS + pGCA	yes	Azoospermia	The biopsy was damaged during processing. In some tubules germ cells are present and in a subset of these as elongating spermatids. Predominantly tubules with only Sertoli cells were present. In addition, extensive hyalinization was noted. A limited number of spermatozoa was observed in the cytology preparation.	HS	HS-severe
Proband_042	SCO + hyalinization	SCO + hyalinization	SCO + hyalinization	SCO	SCO	SCO	No	Azoospermia	No germ cells were observed in any of the three types of testicular preparations.	SCO	SCO
Proband_043	NA	NP	-	HS + pGCA	NP	HS + pGCA	yes	Azoospermia	No histology sample was available. In the cytology sample spermatoza were observed to such an extend that suggested HS-severe. This was also the case in the biopsy analysed for cryopreservation.	HS	HS-severe
Proband_044	NA	NP	-	HS	NP	HS	no	Azoospermia	No histology sample was available. In the cytology sample spermatoza were observed to such an extend that suggested HS-severe. In the biopsy analysed for cryopreservation no spermatozoa were detected.	HS	HS-severe
Proband_045	NP	NA	-	NP	SCO	SCO	No	Azoospermia	Only the cytological preparation was available, herein no germ cells were observed. During inspection of the biopsy-derived cell suspension no spermatozoa were observed either.	SCO	SCO
Proband_046	NA	CS	CS	SCO/minimal GCA	CS	CS	Yes	Azoospermia	No histological sections of left testes available. Quality of histological sections of right side was low due to crushing of the biopsy. In this biopsy 80% of the tubules contained ES. In addition, also tubules in which germ cells were absent were observed. This was confirmed by the cytological preparation. In the cytological preparation of the left bipsy only a small number of spermatocytes were…	CS	CS
Proband_047	SCO	SCO	SCO	SCO	SCO	SCO	no	Azoospermia	A complete lack of germ cells was observed in both biopsies while Sertoli cells were present. This was confirmed by cytology.	SCO	SCO
Proband_048	HS-pGCA	GCA	HS-pGCA	HS	HS	HS	No	Extreme oligozoospermia	Predominantly germ cell devoid-tubules were observed in the histological sections. Pockets of tubules containing complete or incomplete spermatogenesis were observed in the left biopsy. Only arrested spermatogenesis was observed in the right biopsy. The arrest of spermatogenesis was predominantly occuring prior to meiosis. The number of spermatocytes and spermatozoa counted in the cytological pre…	HS	HS-pGCA
Proband_053	NP	HS-severe	HS-severe	NP	HS-pGCA	HS-pGCA	Yes	Extreme oligozoospermia	Histological sections showed ~95% of tubules to contain only Sertoli cells. Occasionally, the epithelium did contain the complete germ cell compartment. The spermatocyte-spermatozoa ratio in the cytological preparations indicated a mild partial arrest and reduced number of spermatozoa per Sertoli cell.	HS	HS-severe
Proband_059	SCO	SCO	SCO	SCO	SCO	SCO	No	Azoospermia	No germ cells were observed in any of the three types of testicular preparations.	SCO	SCO
Proband_060	GCA-spermiogenesis	GCA-spermiogenesis	GCA-spermiogenesis	NA	NA	-	No	Azoospermia	Cytological preparations were absent. Histological sections consistantly showed an arrest prior to spermatid elongation.	GCA	GCA-spermiogenesis
Proband_061	SCO/minimal GCA	HS-pGCA	HS-pGCA	NA	NA	-	Yes	Azoospermia	Cytological preparations were absent. In the histological sections tubules devoid of germ cells were observed in both biopsies although not in equal degree. In the right side biopsy, tubules with complete spermatogenesis and tubules with a maturation arrest predominantly in early meiosis were obsered whereas the left side biopsy showed predominantly Sertoli cell only tubules and occasionally tubu…	HS	HS-pGCA
Proband_063	HS-severe	HS-severe	HS-severe	SCO	HS	HS	Yes	Extreme oligozoospermia	Histological sections showed frequent presence of tubules that contained only Sertoli cells (>95%). However, patches of complete spermatogenesis were occasionally observed.	HS	HS-severe
Proband_065	HS-pGCA	HS-pGCA	HS-pGCA	SCO	SCO	SCO	Yes	Azoospermia	In histological sections tubules the germ cell population consisted predominantly of spermatogonia or very early meiotic cells. However, in both biopsies 1-2 tubules with signs of complete spermatogenesis were seen. No spermatocytes or spermatozoa were seen in the cytology preparations. The biopsy-derived cell suspension, however, contained spermatozoa.	HS	HS-pGCA
Proband_069	NA	NA	-	NA	NA	-	yes	Extreme oligozoospermia	No histology or cytology samples were available. The TESE biopsy contained enough spermatozoa for the ICSI procedure but not enough for cryopreservation. Based on this the sample was classified as HS-severe.	HS	HS-severe
Proband_070	HS-severe	CS	CS	NA	NA	-	Yes	Azoospermia	The left biopsy showed many hyalinzed tubules. In tubules with active spermatogenesis the density of cells was greatly reduced. The right-side biopsy predominantly contained tubules that showed normal spermatogenesis. However, frequently a reduced density of cells was in the epithelium was observed. Number of cells on the cytology slides was too low for quantification	CS	CS
Proband_077	HS-mild	NP	HS-mild	HS + pGCA	NP	HS + pGCA	yes	Extreme oligozoospermia	Less than 30 tubules are available for analysis. Several of these show all stages of germ cells while other tubules only contain Sertoli cells. The cytology preparation indicated presence of all stages of germ cells.	HS	HS-mild
Proband_079	NP	HS-mild	HS-mild	NP	SCO/minimal GCA	SCO/minimal GCA	Yes	Azoospermia	Around 40% of the tubules contained complete spermatogenesis while the remaining ones showed a lack of germ cells. The cytological preparation indicated an extremely reduced germ cell number with respect to Sertoli cells.	HS	HS-mild
Proband_083	CS	CS	CS	p-GCA	p-GCA	p-GCA	Yes	Azoospermia	In the histological sections 75% of the tubules contained ES. However, patches in the seminiferous epithelium with reduced numbers of germ cells were also observed. The cytological analysis indicated a loss of spermatozoa numbers.	CS	CS
Proband_086	HS-pGCA	HS-pGCA	HS-pGCA	HS + pGCA	HS + pGCA	HS + pGCA	yes	Azoospermia	Histology showed severly thinned epithelium in both biopsies. All types of germ cells were present, though tubules showing spermatocytes and spermatids were starkly reduced. The arrest phenotype was also observed in the cytology preparations.	HS	HS-pGCA
Proband_089	SCO/minimal GCA	SCO/minimal GCA	SCO/minimal GCA	SCO	SCO/minimal GCA	SCO/minimal GCA	no	Azoospermia	In both biopsies most tubules only contained Sertoli cells. Some tubules, however contained spermatogonia though spermatocytes were not observed. In the cytology preparation of the right side some spermatocytes were detected. A striking increased width of the basal lamine in many tubules was noted.	SCO/minimal GCA	SCO/minimal GCA
Proband_090	NA	NA	-	NA	NA	-	Yes	Extreme oligozoospermia	No biopsy for histology was taken and no cytological slides were made. Spermatozoa were observed in the biopsy-derived cell suspension.	Unknown	Unknown
Proband_092	SCO	SCO	SCO	SCO	SCO	SCO	No	Azoospermia	No germ cells were observed in any of the three types of testicular preparations.	SCO	SCO
Proband_095	NP	NA	-	NP	pGCA	pGCA	Yes	Azoospermia	No biopsy was availbale for histological analysis. The cytological preparation showed a normal ratio of spermatozoa and Sertoli cells but the spermatocyte/spermatozoa ratio was suggestive for a mild partial maturation arrest.	HS	HS-pGCA
Proband_096	HS-pGCA	HS-pGCA	HS-pGCA	HS	HS	HS	Yes	Extreme oligozoospermia	Histological evaluation showed that the majority of the tubules were arrested the spermatocyte state. Some tubules, however, did contain complete spermatogenesis. Cytological evaluation indicated a loss of germ cells in respect to Sertoli cells. Germ cells number were too low to distinguish p-MA from HS.	HS	HS-pGCA
Proband_097	CS	NP	CS	CS	NP	CS	yes	Azoospermia	Most tubules contain elongating spermatids. Several tubules show a thinned epitithelium. This was confirmed by the cytology preparations.	CS	CS
Proband_106	SCO	SCO	SCO	NA	NA	-	No	Azoospermia	All observed tubules in both biopsies were devoid of germ cells, also in the biopsy-derived cell suspension no spermatozoa were observed. Cytological preparations were unavailable.	SCO	SCO
Proband_115	CS	NA	CS	CS	CS	CS	Yes	Severe oligoasthenozoospermia	The majority (90%) of the tubules observed in the histological sections contained complete spermatogenesis. The cytological preparations also indicated complete spermatogenesis.	CS	CS
Proband_121	NP	NA	-	NP	pGCA	pGCA	yes	Azoospermia	Only cytology was availble for the description. Based on the number of spermatozoa observed the sample was classified as HS-mild	HS	HS-mild
Proband_122	NP	GCA	GCA	NP	GCA	GCA	Yes	Azoospermia	In histology and cytology preparations spermatocytes were identified as being the most progressed germ cell stage. However, some spermatozoa were seen during inspection of the biopsy-derived cell suspension.	HS	HS-pGCA
Proband_123	NA	NA	-	HS + pGCA	NA	HS + pGCA	yes	Azoospermia	No histology sample was available. In the cytology sample spermatoza were observed to such an extend that suggested HS-mild. This was also the case in the biopsy analysed for cryopreservation.	HS	HS-mild
Proband_125	NA	NA	-	NA	NA	-	Yes	Azoospermia	TESE biopsy was performed elsewhere.	Unknown	Unknown
Proband_128	HS-pGCA	HS-pGCA	HS-pGCA	pGCA	HS + pGCA	pGCA	Yes	Azoospermia	Histological sections frequently showed tubules with meiotic arrest in addition to tubules with complete spermatogenesis. This was supported by the cytological analysis.	HS	HS-pGCA
Proband_129	SCO	SCO	SCO	SCO	NA	SCO	no	Azoospermia	A complete lack of germ cells was observed in both biopsies while Sertoli cells were present. This was confirmed by cytology.	SCO	SCO
Proband_131	HS-severe	SCO	HS-severe	HS	SCO	HS	Yes	Azoospermia	Predominantly (95%) germ cell-devoid tubules were observed in the histological sections of the left biopsy, which showed pockets of tubules that contained complete spermatogenesis. In the biopsy from the other side no germ cells were seen. The frequency of spermatocytes and spermatozoa in the cytological preparation of the left biopsy were indicative for hypospermatogenesis. In the cytological pr…	HS	HS-severe
Proband_132	HS-severe	HS-severe	HS-severe	HS + pGCA	HS	HS	Yes	Azoospermia	Both the histological sections as well as cytological preparations indicated hypospermatogenesis. Predominantly (~75%) tubules without germ cells were present in addition to some tubules that contained complete spermatogenesis. This was confirmed by the cytology preparations. The spermatocyte/spermatozoa ratio of the left biopsy indicated a partial maturation arrest.	HS	HS-severe
Proband_134	HS-severe	HS-severe	HS-severe	HS	HS	HS	yes	Extreme oligozoospermia	The majority of tubules both in the left and right biopsy showed only Sertoli cells. Occasionaly tubules with germ cells were present. In a subset of these elongating spermatids were observed. The hypospermatogenesis was confirmed by the cytology preparations	HS	HS-severe
Proband_137	HS-pGCA	HS-pGCA	HS-pGCA	SCO/minimal GCA	SCO/minimal GCA	SCO/minimal GCA	yes	Azoospermia	Histology showed severly thinned epithelium in both biopsies. Frequently tubules with spermatcytes as most progressed state were present. Occasionally elongating spermatids were observed. In comparison, the cytology preparation showed a lower number of germ cells and no spermatozoa were detected.	HS	HS-pGCA
Proband_138	CS	CS	CS	NA	CS	CS	yes	Severe oligozoospermia	Most tubules contained elongating spermatids though several tubules showed a thinned epitithelium. Overall this was confirmed by the cytology preparation.	CS	CS
Proband_140	HS-severe	HS-severe	HS-severe	HS + pGCA	HS	HS	yes	Azoospermia	The majority of tubules both in the left and right biopsy showed only Sertoli cells. Occasionaly tubules with all germ cells stages were present. Overall this was confirmed by the cytology preparations.	HS	HS-severe
Proband_141	HS-pGCA	HS-pGCA	HS-pGCA	CS	CS	CS	yes	Azoospermia	Both biopsies showed numerous tubules that contained spermatocytes as most progressed stages. In some tubules further maturation occured and in a subset of these tubules elongated spermatids were also present. Extensive hyalinisation was noted. The cytology preparations indicated a complete spermatogenesis	HS	HS-pGCA
Proband_142	CS	NA	CS	HS	NA	HS	yes	Azoospermia	Less than 30 tubules were available for analysis. Most of these showed normal to mildly reduced spermatogenesis. In some cases the epithelium was severely thinned and lacking in spermatids. The cytology preparation indicated a hypospermatogenesis.	CS	CS
Proband_143	HS-severe	SCO/minimal GCA	HS-severe	SCO	SCO	SCO	yes	Azoospermia	Both biopsies predominantly showed tubules that only contained Sertoli cells. However, in the left biopsy some patches of complete spermatogenesis were observed whereas in the right biopsy in rare instances incomplete spermatogenesis was observed. In the cytology preparations no germ cells were observed.	HS	HS-severe
Proband_144	CS	HS-severe	CS	HS	HS + pGCA	HS	Yes	Azoospermia	Quality of spermatogenesis varied largely between left and right biopsies. In the left biopsy the majority of the tubules contained complete spermatogenesis although germ cell number did appear reduced in the epithelium. In the right biopsy germ cell-devoid tubules were predominantly observed while pockets of tubules containing spermatogenesis only occasionally.	CS	CS
Proband_148	SCO	SCO	SCO	SCO	SCO	SCO	no	Azoospermia	A complete lack of germ cells was observed in both biopsies while Sertoli cells were present. This was confirmed by cytology.	SCO	SCO
Proband_149	SCO	SCO	SCO	NA	NA	-	yes	Azoospermia	A complete lack of germ cells was observed in both biopsies while Sertoli cells were present. No cytology preparations were available. Spermatozoa were obseved in the sample prepared for cryopreservation.	HS	HS-severe
Proband_150	SCO	SCO	SCO	SCO/minimal GCA	SCO/minimal GCA	SCO/minimal GCA	no	Azoospermia	A complete lack of germ cells was observed in this biopsy while Sertoli cells were present. However, some spermatocytes were observed in the cytology preparations.	SCO/minimal GCA	SCO/minimal GCA
Proband_151	SCO/minimal-GCA	SCO/minimal-GCA	SCO/minimal GCA	SCO/minimal MA	SCO/minimal MA	SCO/minimal MA	No	Azoospermia	In the histological sections tubules devoid of germ cells were predominantly present. However, occasionally spermatocytes were observed. This was corroborated by the cytological analysis.	SCO/minimal GCA	SCO/minimal GCA
Proband_152	GCA in spermiogenesis	GCA in spermiogenesis	GCA-round spermatid	CS, spermatid morphology aberrant	CS, spermatid morphology aberrant	CS, spermatid morphology aberrant	No	Azoospermia	Uniform maturation arrest in spermiogenesis. Spermatids arrested prior to elongation.	GCA	GCA-spermiogenesis
Proband_153	SCO	SCO	SCO	SCO	SCO/minimal MA	SCO/minimal MA	Yes	Azoospermia	No germ cells were obsered in the histological preparations. The cytological analysis showed that spermatocytes were present in the right-side biopsy but a completely lacked in the left-side biopsy. Howevere, spermatozoa were seen during inspection of the biopsy-derived cell suspension, indicating hypospermatogenesis.	HS	HS-severe
Proband_155	SCO	SCO	SCO	SCO	SCO	SCO	yes	Azoospermia	A complete lack of germ cells was observed in both biopsies while Sertoli cells were present. This was confirmed by the cytology preparations. However, spermatozoa were obseved in the sample prepared for cryopreservation.	HS	HS-severe
Proband_156	SCO	SCO	SCO	HS	SCO/minimal GCA	HS	no	Azoospermia	A complete lack of germ cells was observed in both biopsies while Sertoli cells were present. The cytology preparations, however, indicated hypospermatogenesis. No spermatozoa were obseved in the sample prepared for cryopreservation.	HS	HS-severe
Proband_157	SCO	SCO	SCO	SCO/minimal GCA	SCO/minimal GCA	SCO/minimal GCA	no	Azoospermia	A complete lack of germ cells was observed in this biopsy while Sertoli cells were present. However, some spermatocytes were observed in the cytology preparations.	SCO/minimal GCA	SCO/minimal GCA
Proband_159	SCO	SCO	SCO	NA	NA	-	yes	Azoospermia	A complete lack of germ cells was observed in both biopsies while Sertoli cells were present. No cytology preparations were available. Spermatozoa were obseved in the sample prepared for cryopreservation.	HS	HS-severe
Proband_160	GCA-meiotic	GCA-meiotic	GCA-meiotic	SCO	SCO/minimal GCA	SCO/minimal GCA	no	Azoospermia	In both biopsies the epithelium of all tubules was severely thinned. In most tubules some spermatocytes were observed though in some only spermatogonia. The reduced numbers were confirmed by the cytology preparations.	GCA	GCA-meiotic
Proband_161	SCO	SCO	SCO	SCO	SCO	SCO	no	Azoospermia	A complete lack of germ cells was observed in both biopsies while Sertoli cells were present. This was confirmed by cytology.	SCO	SCO
Proband_162	GCA-round spermatid	NP	GCA-round spermatid	NA	CS	CS (abberent spermatid morphology)	no	Extreme oligozoospermia	In this biopsy spermatogenesis was arrested at the round spermatid stage. No elongated spermatids were observed in the cytology preparations, instead condensed round spermatids were quantified.	GCA	GCA-round spermatid
Proband_163	HS-severe	HS-severe	HS-severe	HS	HS	HS	yes	Azoospermia	Both biopsies predominantly showed tubules that only contained Sertoli cells. In some tubules all stages of spermatogenesis were observed but always in diminished density. Several tubules were completely hyalinised. This was overall confirmed by the cytology preparations.	HS	HS-severe
Proband_164	HS-severe	HS-severe	HS-severe	HS	HS	HS	yes	Azoospermia	Both biopsies predominantly showed tubules that only contained Sertoli cells. In some tubules all stages of spermatogenesis were observed but always in diminished density. In another small subset of tubules only spermatogonia were present in addition to Sertoli cells. This was overall confirmed by the cytology preparations.	HS	HS-severe
Proband_165	NP	HS-pGCA	HS-pGCA	NP	HS + pGCA	HS + pGCA	yes	Extreme oligozoospermia	In the biopsy all tubules contained germ cells. Some tubules presented with a meiotic arrest whereas in other tubules a round spermatid arrest was observed. However, patches of complete spermatogenesis were also infrequently observed. This was overall confirmed by the cytology preparations.	HS	HS-pGCA
Proband_166	SCO	SCO	SCO	SCO	SCO	SCO	no	Azoospermia	A complete lack of germ cells was observed in both biopsies while Sertoli cells were present. This was confirmed by cytology.	SCO	SCO
Proband_167	CS	HS-severe	CS	CS	HS	CS	yes	Azoospermia	In the left biopsy the majority of the tubules contain all stages of spermatogenesis. The density of germ cells in the epithelium is somewhat reduced. In the biopsy form the right side only a minority of the tubules contain traces of spermatogenesis. In addition, numurous tubules have undergone extensive hyalinization. This was overall confirmed by the cytology preparations.	CS	CS
Proband_168	SCO	HS-mild	HS-mild	HS	CS	CS	yes	Extreme oligozoospermia	In the left biopsy no germ cells were present in the tubules whereas in the right biopsy a significant part of the tubules contained complete spermatogenesis. The cytology preparation of the left biopsy did not confirm the SCO phenotype. For the right side histology and cytology were congruent.	CS	CS
Proband_169	HS-mild	HS-mild	HS-mild	HS + pGCA	HS + pGCA	HS + pGCA	yes	Azoospermia	In both biopsies elongating spermatids were regularly observed. The cytology preparations suggested a maturation arrest.	HS	HS-mild
Proband_170	HS-mild	GCA-spermatogonia	HS-mild	HS + pGCA	HS	HS + pGCA	yes	Azoospermia	A stark difference was observed between both testis. The left biopsy showed normal spermatogenesis in ~45% of the tubules. The remainder of the tubules predominantly showed spermatogonia as most progressed stage. In the right biopsy only tubules with incomplete spermatogenesis were observed. Most tubules showed spermatogonia as the sole germ cell type, though spermatocytes were occasionally detec…	HS	HS-Mild
Proband_171	SCO	SCO	SCO	NA	NA	-	no	Azoospermia	A complete lack of germ cells was observed in both biopsies while Sertoli cells were present. Reduced tubule calibre and mild basal lamina thickening was noted.	SCO	SCO
Proband_172	GCA-round spermatid	GCA-round spermatid	GCA-round spermatid	NA	NA	-	no	Azoospermia	In both biopsies spermatogenesis was arrested at the round spermatid stage in all viable tubules.	GCA	GCA-round spermatid
Proband_173	SCO	SCO	SCO	NA	NA	-	yes	Azoospermia	A complete lack of germ cells was observed in both biopsies while Sertoli cells were present. Reduced tubule calibre and mild basal lamina thickening in most tubules was noted.	HS	HS-severe
Proband_174	SCO	SCO	SCO	NA	NA	-	no	Azoospermia	A complete lack of germ cells was observed in both biopsies while Sertoli cells were present.	SCO	SCO
Proband_175	100% hyalinised tubules	100% hyalinised tubules	SCO	NA	NA	-	no	Azoospermia	Right no viable tubules. Left germ cell neoplasia in situ in 3% tubules, remainder of tubules hyalinised.	TS	Tubular shadows
Proband_176	SCO	SCO	SCO	NA	NA	-	yes	Azoospermia	A complete lack of germ cells was observed in both biopsies while Sertoli cells were present. Reduced tubule calibre and basal lamina thickening was noted.	HS	HS-severe
Proband_179	SCO	SCO/Minimal GCA	SCO/minimal GCA	NA	NA	-	yes	Azoospermia	In both biopsies most tubules contained only Sertoli cells. Some tubules, however contained spermatogonia through to round spermatids; no elongated spermatids were identified.	HS	HS-severe
Proband_180	SCO	SCO/Minimal GCA	SCO/minimal GCA	NA	NA	-	yes	Azoospermia	In both biopsies most tubules contained only Sertoli cells. Some tubules, however contained spermatogonia through to rounded spermatids; no elongated spermatids were identified.	HS	HS-severe
Proband_182	SCO/Minimal GCA	SCO/Minimal GCA	SCO/minimal GCA	NA	NA	-	yes	Azoospermia	In both biopsies most tubules contained only Sertoli cells. Some tubules, however contained spermatogonia though to rounded spermatids; no elongated spermatids were identified.	HS	HS-severe
Proband_183	HS-mild	GCA-round spermatid	HS-mild	NA	NA	-	no	Azoospermia	Germ cells are present in all tubules and in a subset of these as elongating spermatids (50%)	HS	HS-mild
Proband_184	GCA-round spermatid	GCA-round spermatid	GCA-round spermatid	NA	NA	-	no	Azoospermia	Approximately 50% of the tubels lacked germ cells. In the tubules that contained germ cells the majority of these showed round spermatids. However, also tubules with earlier arrest were observed.	GCA	GCA-round spermatid
Proband_185	SCO	SCO	SCO	NA	NA	-	no	Azoospermia	A complete lack of germ cells was observed in both biopsies while Sertoli cells were present. Reduced tubule calibre and mild basal lamina thickening was noted.	SCO	SCO

## Sheet: Table 5 Cytology data
Patient ID	Biopsy left side			Ratio's left side				Biopsy right side		Ratio's left side
	Nr. Sertoli cells	Nr. spermatocytes	Nr. spermatozoa	Spermatocytes/spermatozoa	Spermatozoa/Sertoli cells*100	Conclusion	Nr. Sertoli cells	Nr. spermatocytes	Nr. spermatozoa	Spermatocytes/spermatozoa	Spermatzoa/Sertoli cells*100	Conclusion
Proband_001	226	3	2	1.5	0.884956	HS	NP	NP	NP	-	-	-
Proband_002	390	12	0	-	-	SCO/minimal GCA	389	11	0	-	-	SCO/minimal GCA
Proband_003	500	0	0	-	-	SCO	265	55	108	0.5	40.7547	CS
Proband_004	400	0	0	-	-	SCO	400	0	0	-	-	SCO
Proband_005	400	0	0	-	-	SCO	400	0	0	-	-	SCO
Proband_006	382	18	0	-	-	SCO/minimal GCA	380	24	0	-	-	SCO/minimal GCA
Proband_007	400	0	0	-	-	SCO	NA	NA	NA	-	-	-
Proband_008	400	0	0	-	-	SCO	400	0	0	-	-	SCO
Proband_009	400	0	0	-	-	SCO	NP	NP	NP	-	-	-
Proband_010	NA	NA	NA	-	-	-	NP	NP	NP	-	-	NA
Proband_011	400	0	0	-	-	SCO	400	0	0	-	-	SCO
Proband_012	NP	NP	NP	-	-	-	151	183	66	2.8	43.7086	pGCA
Proband_013	400	0	0	-	-	SCO	400	0	0	-	-	SCO
Proband_014	NP	NP	NP	-	-	-	400	0	0	-	-	SCO
Proband_015	400	0	0	-	-	SCO	400	0	0	-	-	SCO
Proband_016	NP	NP	NP	-	-	-	400	0	0	-	-	SCO
Proband_017	379	10	11	0.9	2.90237	HS + pGCA	NA	NA	NA	-	-	-
Proband_018	402	18	0	-	-	SCO/minimal GCA	NP	NP	NP	-	-	-
Proband_019	400	0	0	-	-	SCO	NP	NP	NP	-	-	-
Proband_020	NP	NP	NP	-	-	-	400	0	0	-	-	SCO
Proband_021	400	0	0	-	-	SCO	NP	NP	NP	-	-	-
Proband_022	NP	NP	NP	-	-	-	400	0	0	-	-	SCO
Proband_023	NA	NA	NA	-	-	-	NP	NP	NP	-	-	-
Proband_024	389	7	4	1.8	1.02828	HS	NA	NA	NA	-	-	-
Proband_025	398	5	0	-	-	SCO/minimal GCA	200	0	0	-	-	SCO
Proband_026	NP	NP	NP	-	-	-	393	5	3	1.7	0.763359	HS
Proband_027	132	169	125	1.4	94.697	pGCA	NP	NP	NP	-	-	-
Proband_028	381	19	0	-	-	SCO/minimal GCA	386	15	0	-	-	SCO/minimal GCA
Proband_029	NP	NP	NP	-	-	-	398	2	0	-	-	SCO/minimal GCA
Proband_030	219	92	89	1.03371	40.6393	CS	NP	NP	NP	-	-	-
Proband_031	398	2	0	-	-	SCO/minimal GCA	399	1	0	-	-	SCO/minimal GCA
Proband_032	382	17	1	17	0.26178	HS	269	56	75	0.7	27.881	CS
Proband_033	NP	NP	NP	-	-	-	400	0	0	-	-	SCO
Proband_034	400	0	0	-	-	SCO	400	0	0	-	-	SCO
Proband_035	385	9	6	1.5	1.55844	HS	NA	NA	NA	-	-	-
Proband_036	400	0	0	-	-	SCO	NP	NP	NP	-	-	-
Proband_037	NP	NP	NP	-	-	-	271	68	62	1.1	22.8782	pGCA
Proband_038	388	10	1	10	0.257732	HS	NP	NP	NP	-	-	-
Proband_039	400	0	0	-	-	SCO	NA	NA	NA	-	-	-
Proband_040	NP	NP	NP	-	-	-	367	36	24	1.5	6.53951	HS + pGCA
Proband_041	359	30	11	2.72727	3.06407	HS + pGCA	NP	NP	NP	-	-	-
Proband_042	400	0	0	-	-	SCO	400	0	0	-	-	SCO
Proband_043	379	21	1	21	0.263852	HS + pGCA	NP	NP	NP	-	-	-
Proband_044	388	9	3	3	0.773196	HS	NP	NP	NP	-	-	-
Proband_045	NP	NP	NP	-	-	-	400	0	0	-	-	SCO
Proband_046	412	6	0	-	-	SCO/minimal GCA	199	80	124	0.6	62.3116	CS
Proband_047	400	0	0	-	-	SCO	400	0	0	-	-	SCO
Proband_048	387	10	4	2.5	1.03359	HS	396	3	1	3	0.252525	HS
Proband_053	NP	NP	NP	-	-	-	367	20	17	1.2	4.63215	HS + pGCA
Proband_059	400	0	0	-	-	SCO	400	0	0	-	-	SCO
Proband_060	NA	NA	NA	-	-	-	NA	NA	NA	-	-	-
Proband_063	400	0	0	-	-	SCO	394	5	2	2.5	0.507614	HS
Proband_065	400	0	0	-	-	SCO	400	0	0	-	-	SCO
Proband_069	NA	NA	NA	-	-	-	NA	NA	NA	-	-	-
Proband_070	NA	NA	NA	-	-	-	NA	NA	NA	-	-	-
Proband_077	371	21	8	2.625	2.15633	HS + pGCA	NP	NP	NP	-	-	-
Proband_079	NP	NP	NP	-	-	-	399	1	0	-	-	SCO/minimal GCA
Proband_083	130	143	127	1.1	97.6923	pGCA	143	147	111	1.3	77.6224	pGCA
Proband_086	365	15	20	0.75	5.47945	HS + pGCA	220	29	29	1	13.1818	HS + pGCA
Proband_089	400	0	0	-	-	SCO	397	3	0	-	-	SCO/minimal GCA
Proband_090	NA	NA	NA	-	-	NA	NA	NA	NA	-	-	-
Proband_092	400	0	0	-	-	SCO	400	0	0	-	-	SCO
Proband_095	NP	NP	NP	-	-	-	281	58	61	1	21.7082	pGCA
Proband_096	390	8	2	4	0.512821	HS	380	13	7	1.9	1.84211	HS
Proband_097	189	69	143	0.482517	75.6614	CS	NP	NP	NP	-	-	-
Proband_106	NA	NA	NA	-	-	NA	NA	NA	NA	-	-	-
Proband_115	166	66	168	0.4	101.205	CS	137	93	170	0.5	124.088	CS
Proband_121	NP	NP	NP	-	-	-	262	62	76	0.815789	29.0076	pGCA
Proband_122	NP	NP	NP	-	-	-	270	130	0	-	-	GCA
Proband_123	311	70	19	3.68421	6.10932	HS + pGCA	NP	NP	NP	-	-	-
Proband_128	220	117	63	1.9	28.6364	pGCA	309	51	40	1.3	12.945	HS + pGCA
Proband_129	400	0	0	-	-	SCO	NA	NA	NA	-	-	-
Proband_131	367	19	14	1.4	3.81471	HS	400	0	0	-	-	SCO
Proband_132	339	40	21	1.9	6.19469	HS + pGCA	394	4	2	2	0.507614	HS
Proband_134	377	4	19	0.210526	5.03979	HS	383	4	14	0.285714	3.65535	HS
Proband_137	388	12	0	-	-	SCO/minimal GCA	390	13	0	-	-	SCO/minimal GCA
Proband_138	NP	NP	NP	-	-	-	180	35	185	0.189189	102.778	CS
Proband_140	365	25	10	2.5	2.73973	HS + pGCA	380	12	8	1.5	2.10526	HS
Proband_141	264	58	78	0.74359	29.5455	CS	NA	NA	NA	-	-	-
Proband_142	321	15	64	0.234375	19.9377	HS	NA	NA	NA	-	-	-
Proband_143	400	0	0	-	-	SCO	400	0	0	-	-	SCO
Proband_144	389	8	3	2.7	0.771208	HS	375	13	12	1.1	3.2	HS + pGCA
Proband_148	400	0	0	-	-	SCO	400	0	0	-	-	SCO
Proband_149	NA	NA	NA	-	-	-	NA	NA	NA	-	-	-
Proband_150	398	2	0	-	-	SCO/minimal GCA	399	1	0	-	-	SCO/minimal GCA
Proband_151	394	6	0	-	-	SCO/minimal GCA	396	4	0	-	-	SCO/minimal GCA
Proband_152	187	107	108	1	57.754	CS, spermatid morphology aberrant	245	54	103	0.5	42.0408	CS
Proband_153	400	0	0	-	-	SCO	390	10	0	-	-	SCO/minimal GCA
Proband_155	400	0	0	-	-	SCO	400	0	0	-	-	SCO
Proband_156	395	4	1	4	0.253165	HS	395	5	0	-	-	SCO/minimal GCA
Proband_157	395	5	0	-	-	SCO/minimal GCA	394	6	0	-	-	SCO/minimal GCA
Proband_159	NA	NA	NA	-	-	-	NA	NA	NA	-	-	-
Proband_160	400	0	0	-	-	SCO	395	5	0	-	-	SCO/minimal GCA
Proband_161	400	0	0	-	-	SCO	400	0	0	-	-	SCO
Proband_162	NA	NA	NA	-	-	-	263	47	90	0.522222	34.2205	CS
Proband_163	394	5	4	1.25	1.01523	HS	375	10	11	0.909091	2.93333	HS
Proband_164	388	7	7	1	1.80412	HS	391	5	4	1.25	1.02302	HS
Proband_165	NP	NP	NP	-	-	-	337	47	17	2.76471	5.04451	HS + pGCA
Proband_166	400	0	0	-	-	SCO	400	0	0	-	-	SCO
Proband_167	239	34	130	0.261538	54.3933	CS	357	10	33	0.30303	9.2437	HS
Proband_168	220	43	140	0.307143	63.6364	CS	378	6	16	0.375	4.2328	HS
Proband_169	290	95	15	6.33333	5.17241	HS + pGCA	306	56	38	1.47368	12.4183	HS + pGCA
